# Supplementary material for: In situformation of a carbon fiber@Ni3S2non-woven electrode with ultrahigh areal and volumetric capacitance
Source: Royal Society of Chemistry journal article supplement (doi:10.1039/c7ta08802g), 2017-01-01
Supplement: c7ta08802g1.pdf [file c7ta08802g1.pdf]

Supporting information for

In situ formation of carbon fiber@Ni<sub>3</sub>S<sub>2</sub> non-woven electrode with ultrahigh areal and  
volumetric capacitance

Yuanzhen Chen, <sup>1</sup> Tengfei Zhou, <sup>2</sup> Yongning Liu\*<sup>1</sup> & Zaiping Guo\*<sup>2</sup>

<sup>1</sup> The State Key Laboratory for Mechanical Behavior of Materials, School of  
Materials Science and Engineering, Xi'an Jiaotong University, Xi'an 710049, PR  
China.

<sup>2</sup>Institute for Superconducting & Electronic Materials, University of Wollongong,  
NSW 2500, Australia.

\*Corresponding authors

Email: [ynliu@mail.xjtu.edu.cn](mailto:ynliu@mail.xjtu.edu.cn) (Y.N. Liu), [zguo@uow.edu.au](mailto:zguo@uow.edu.au) (Z.P. Guo).

## Experimental details

**Preparation of Ni-CP:** In this work, electroplating was employed to prepare Ni / carbon paper (Ni-CP) composite. The detailed process is: CP with a size of  $1\text{ cm} \times 2.5\text{ cm} \times 0.017\text{ cm}$  (thickness) was connected to the negative electrode of a DC power supply, and two pieces of Ni plate were connected to the positive electrode, as shown in Figure 1a in the main text. The electrolyte was an aqueous  $\text{NiSO}_4$  solution with a concentration of  $240\text{ g L}^{-1}$ . In the process of electroplating, a current density of  $20\text{ mA cm}^{-2}$  was used for different time to prepare the samples denoted as Ni-CP-x (where x is the time in minutes).

**Preparation of  $\text{Ni}_3\text{S}_2$ -CP:** The as-prepared Ni-CP-x was immersed in an S-alcohol solution, in which different masses of S were used in a mole ratio of  $n_{\text{S}}:n_{\text{Ni}}=2:1$ . The hydrothermal method was used to prepare  $\text{Ni}_3\text{S}_2$ -CP. The autoclave was kept at  $180\text{ }^\circ\text{C}$  for 10 h in an oven and then cooled down to room temperature, yielding the  $\text{Ni}_3\text{S}_2$ -CP.

**Characterization of materials.** The morphology of the samples was studied by field emission scanning electron microscopy (FESEM, JSM-6700F), and X-ray diffraction (XRD) analysis was performed using an X'pert PRO X-ray diffractometer with Cu  $K\alpha$  radiation ( $\lambda = 0.154\text{ nm}$ ). The specific surface area (SSA) and pore volume were calculated by  $\text{N}_2$  adsorption-desorption measurements, which were carried out on an ASAP 2460 surface area and porosity analyzer device.

## Electrochemical measurements.

The cyclic voltammetry (CV) measurements were performed on an electrochemistry workstation (CHI 660 C) using a three-electrode system in  $2\text{ M KOH}$  solution at room

temperature. The three-electrode assembly was constructed using Ni<sub>3</sub>S<sub>2</sub>-CP-x as the working electrode, platinum foil as the counter electrode, and Hg/HgO electrode as the reference electrode. Galvanostatic charge–discharge (GCD) measurements were also performed on the three-electrode system. The specific capacitance was calculated from the discharge process of the GCD according to Equations (1-3):

$$C = \frac{2 \times i \times \int_{U_i}^{U_f} U dt}{U^2|_{U_i}^{U_f}} \quad (1)$$

$$C_a = \frac{C}{S} \quad (2)$$

$$C_v = \frac{C}{V} \quad (3)$$

where  $C$  is the specific capacitance of the electrode (F);  $i$  is the current density (A);  $\int U dt$  is the integral current area;  $U$  is the potential (V) with initial and final values of  $U_i$  and  $U_f$ , respectively;  $C_a$  is the specific areal capacitance (F cm<sup>-2</sup>);  $C_v$  is the specific volumetric capacitance (F cm<sup>-2</sup>);  $S$  and  $V$  are the surface area and volume of the electrode, respectively.

For all materials, after activation for 50 cycles of CV (discharge to 0 V for the last cycle), the open circuit potential gradually became stable, and then electrochemical impedance spectroscopy (EIS) was conducted in the frequency range of 10<sup>-2</sup> to 10<sup>5</sup> Hz at the stable open circuit potential with an alternating current amplitude of 5 mV.

Table S1. Areal loading of different electrodes and corresponding specific capacitance based on mass, area, and volume.

| Electrodes                                                                                              | loading/<br>mg cm <sup>-2</sup> | Cs/ Fg <sup>-1</sup>          | Areal<br>Cs/ F cm <sup>-2</sup> | Volumetric<br>Cs/ F·cm <sup>-3</sup> |
|---------------------------------------------------------------------------------------------------------|---------------------------------|-------------------------------|---------------------------------|--------------------------------------|
| Co <sub>3</sub> O <sub>4</sub> nanosheet/ NF <sup>1</sup>                                               | 1.4                             | 2735 (2 Ag <sup>-1</sup> )    | 3.8                             | 38                                   |
| Co <sub>3</sub> O <sub>4</sub> nanowire/NF <sup>2</sup>                                                 | 1.48                            | 1019 (3.38 Ag <sup>-1</sup> ) | 1.5                             | 15                                   |
| Ni(OH) <sub>2</sub> /NF <sup>3</sup>                                                                    | 0.5                             | 3152 (4 Ag <sup>-1</sup> )    | 1.6                             | 16                                   |
| NiMoO <sub>4</sub> /NF <sup>4</sup>                                                                     | 0.8                             | 3205 (6 Ag <sup>-1</sup> )    | 2.56                            | 25.6                                 |
| NiCo <sub>2</sub> O <sub>4</sub> /NF <sup>5</sup>                                                       | 0.8                             | 2010 (2 Ag <sup>-1</sup> )    | 1.68                            | 16.8                                 |
| NiCo <sub>2</sub> O <sub>4</sub> @MnO <sub>2</sub> /NF <sup>6</sup>                                     | 1.4                             | 2364 (1.4 Ag <sup>-1</sup> )  | 3.31                            | 33.1                                 |
| Ni(OH) <sub>2</sub> /3D graphene <sup>7</sup>                                                           | 1                               | 1440 (10 Ag <sup>-1</sup> )   | 1.4                             | 14                                   |
| Ni(OH) <sub>2</sub> /3D graphene <sup>8</sup>                                                           | 0.2                             | 1560 (0.5 Ag <sup>-1</sup> )  | 0.78                            | 7.8                                  |
| CoMoO <sub>4</sub> /3D graphene <sup>9</sup>                                                            | 0.51                            | 2741 (1.4 Ag <sup>-1</sup> )  | 1.4                             | 14                                   |
| Co <sub>x</sub> Ni <sub>1-x</sub> (OH) <sub>2</sub> /3D graphene <sup>10</sup>                          | 0.09                            | 1847 (5 Ag <sup>-1</sup> )    | 0.17                            | 1.7                                  |
| NiMoO <sub>4</sub> /CP <sup>11</sup>                                                                    | 0.8                             | 1587 (6.25 Ag <sup>-1</sup> ) | 1.27                            | 74.7                                 |
| Co <sub>x</sub> Ni <sub>1-x</sub> (OH) <sub>2</sub> /NiCo <sub>2</sub> O <sub>4</sub> /CP <sup>12</sup> | 1                               | 1640 (2 Ag <sup>-1</sup> )    | 1.64                            | 96.5                                 |
| Co <sub>3</sub> O <sub>4</sub> /CP <sup>13</sup>                                                        | 0.4                             | 1190 (0.25 Ag <sup>-1</sup> ) | 0.48                            | 28.2                                 |
| Co <sub>3</sub> O <sub>4</sub> /CP <sup>13</sup>                                                        | 1.4                             | 948 (0.25 Ag <sup>-1</sup> )  | 1.33                            | 78                                   |

Note: NF is Ni foam; CP is carbon fiber paper.

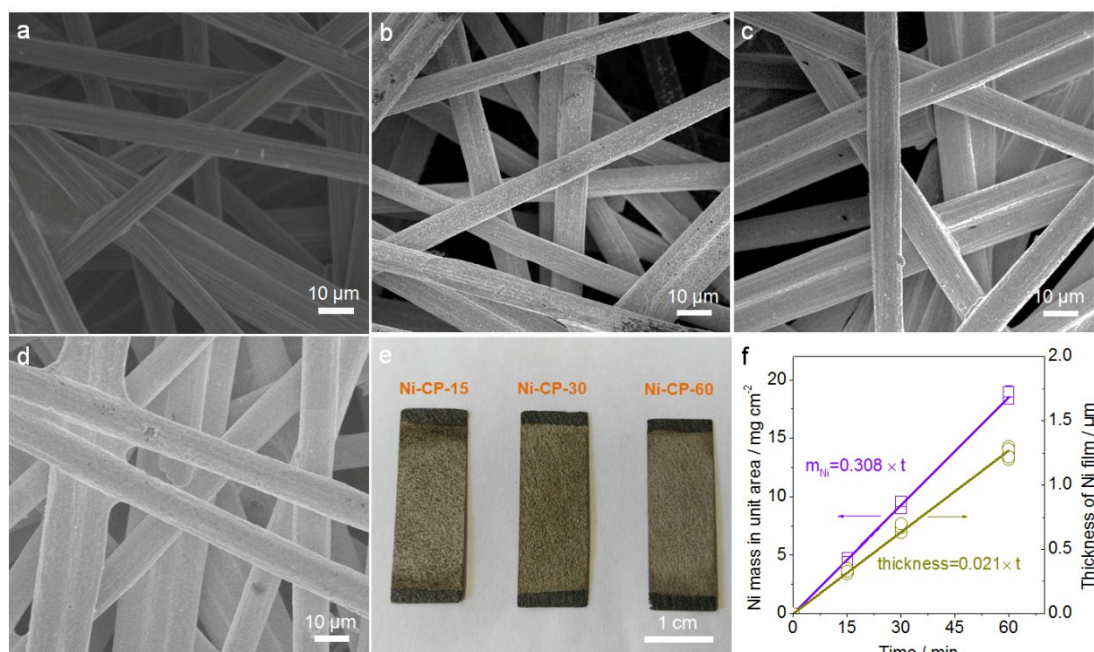

Figure S1. SEM images of (a) carbon paper, (b) Ni-CP-15, (c) Ni-CP-30, (d) Ni-CP-60. (e) Photograph of prepared Ni-CP-x samples. (f) The dependence of the mass and the thickness of the Ni film on the electroplating time.

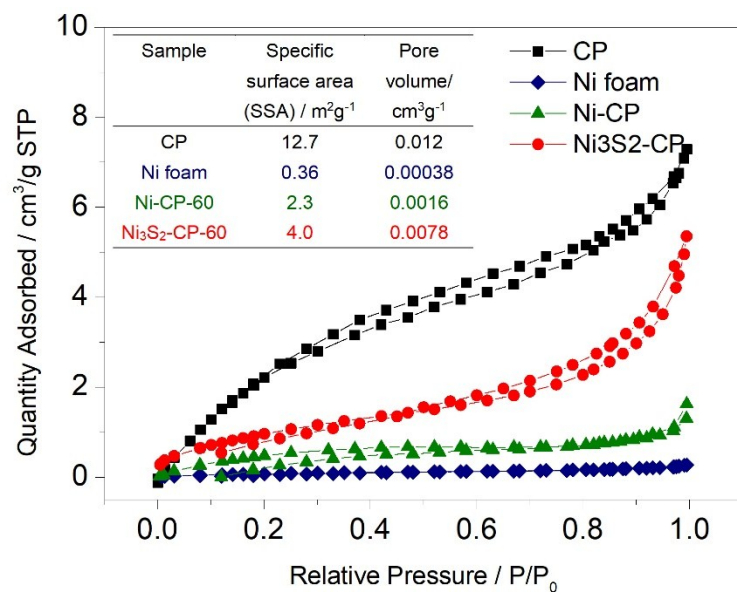

Figure S2. N<sub>2</sub> adsorption-desorption isotherms of CP, Ni foam, Ni-CP-60 and Ni<sub>3</sub>S<sub>2</sub>-CP-60 and the calculated specific surface area (SSA) and pore volume values.

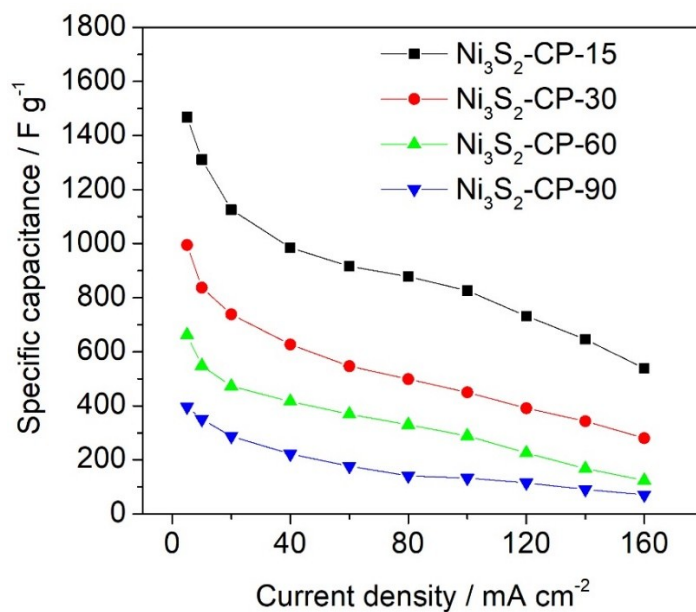

Figure S3. The gravimetric capacitances of samples.

## References

- 1 C. Yuan, L. Yang, L. Hou, L. Shen, X. Zhang, X. W. Lou, *Energ. Environ. Sci.* 2012, **5**, 7883.
- 2 J. Huang, J. Zhu, K. Cheng, Y. Xu, D. Cao, G. Wang, *Electrochim. Acta* 2012, **75**, 273.
- 3 G.-W. Yang, C.-L. Xu, H.-L. Li, *Chem. Commun.* 2008, 6537.
- 4 D. Cai, B. Liu, D. Wang, Y. Liu, L. Wang, H. Li, Y. Wang, C. Wang, Q. Li, T. Wang, *Electrochim. Acta* 2014, **125**, 294.
- 5 C. Yuan, J. Li, L. Hou, X. Zhang, L. Shen, X. W. D. Lou, *Adv. Funct. Mater.* 2012, **22**, 4592.
- 6 L. Yu, G. Zhang, C. Yuan, X. W. Lou, *Chem. Commun.* 2013, **49**, 137.
- 7 T. Xiao, X. Hu, B. Heng, X. Chen, W. Huang, W. Tao, H. Wang, Y. Tang, X. Tan, X. Huang, *J. Alloys Compd.* 2013, **549**, 147.
- 8 J. Ji, L. L. Zhang, H. Ji, Y. Li, X. Zhao, X. Bai, X. Fan, F. Zhang, R. S. Ruoff, *ACS nano* 2013, **7**, 6237.
- 9 X. Yu, B. Lu, Z. Xu, *Adv. Mater.* 2014, **26**, 1044.
- 10 U. M. Patil, J. S. Sohn, S. B. Kulkarni, S. C. Lee, H. G. Park, K. V. Gurav, J. H. Kim, S. C. Jun, *ACS Appl. Mater. Interfaces* 2014, **6**, 2450.
- 11 D. Guo, Y. Luo, X. Yu, Q. Li, T. Wang, *Nano Energy* 2014, **8**, 174.
- 12 L. Huang, D. Chen, Y. Ding, S. Feng, Z. L. Wang, M. Liu, *Nano Lett.* 2013, **13**, 3135.
- 13 L. Yang, S. Cheng, Y. Ding, X. Zhu, Z. L. Wang, M. Liu, *Nano Lett.* 2011, **12**,

321.
